# Supplementary material
Source: Springer Nature journal article supplement (https://www.springermedizin.de/resource/supplementary/12889_2007_1031_MOESM3_ESM.pdf/9503174)
Supplement: MOESM3 [file 9503174]

| Public Activities |         |                      |      |                   |      |                |      |                   |      |               |       |                     |      |                     |                            |                                   |        |                                    |      |                               |       |      |      |
|-------------------|---------|----------------------|------|-------------------|------|----------------|------|-------------------|------|---------------|-------|---------------------|------|---------------------|----------------------------|-----------------------------------|--------|------------------------------------|------|-------------------------------|-------|------|------|
| 11-12th graders   |         | survey given         |      | 89                |      | surveys usable |      | 63                |      |               |       |                     |      |                     |                            |                                   |        |                                    |      |                               |       |      |      |
| Activity type     | Num Obs | Number of Activities |      | Time (hr)         |      | Primary Links  |      | Contact-hours     |      | Contact-level |       | Contact-level-hours |      | Participating Group | Fraction counted in groups | Random Contacts per participation |        | Random Contacts per person per day |      | Random Contacts Contact-level |       |      |      |
|                   |         | per person per day   |      | per participation |      |                |      | per participation |      |               |       | per person per day  |      |                     |                            | per participation                 |        | per person per day                 |      | Contact-level                 |       |      |      |
|                   |         | Avg                  | CV   | Avg               | CV   | Avg            | CV   | Avg               | CV   | Avg           | CV    | Avg                 | CV   |                     |                            | Avg                               | CV     | Avg                                | CV   | Avg                           | CV    |      |      |
| Passing           | 63      | 5.07                 | 0.16 | 0.17              | 0.00 | 4.58           | 0.87 | 0.76              | 0.87 | 2.28          | 0.22  | 9.05                | 0.93 | f                   | 0.11                       | 8.75                              | 1.39   | 44.37                              | 1.40 | 1.69                          | 0.35  |      |      |
| Car rides         | 63      | 3.54                 | 0.70 | 0.43              | 1.19 | 2.54           | 0.67 | 1.33              | 1.93 | 2.15          | 0.28  | 11.02               | 2.31 | f, H                | 0.20                       | 0.48                              | 2.15   | 1.69                               | 2.27 | 1.69                          | 0.34  |      |      |
| School bus        | 8       | 0.11                 | 3.09 | 0.29              | 0.22 | 1.00           | 1.16 | 0.33              | 1.35 | 1.80          | 0.25  | 0.07                | 3.47 | f                   | 0.00                       | 3.83                              | 1.65   | 0.41                               | 3.51 | 1.25                          | 0.37  |      |      |
| City bus          | 5       | 0.01                 | 5.47 | 0.42              | 0.85 | 1.50           | 0.47 | 0.57              | 0.72 | 2.10          | 0.31  | 0.01                | 5.55 | f, H                | 0.00                       | 4.00                              | 3.16   | 0.03                               | 5.69 | 1.38                          | 0.35  |      |      |
| Mall              | 51      | 0.07                 | 1.92 | 1.65              | 0.44 | 2.90           | 0.72 | 5.06              | 0.97 | 2.34          | 0.20  | 0.87                | 2.20 | f, H                | 0.34                       | 8.47                              | 1.30   | 0.60                               | 2.32 | 1.65                          | 0.29  |      |      |
| Errands           | 52      | 0.72                 | 2.06 | 0.91              | 0.89 | 1.37           | 0.89 | 1.34              | 1.52 | 2.07          | 0.31  | 1.99                | 2.54 | f, H                | 0.12                       | 4.13                              | 1.79   | 2.97                               | 2.73 | 1.47                          | 0.31  |      |      |
| Movies            | 57      | 0.05                 | 0.94 | 2.76              | 0.34 | 3.29           | 0.61 | 8.98              | 0.66 | 2.40          | 0.23  | 1.19                | 1.26 | f, H                | 0.38                       | 9.17                              | 1.61   | 0.50                               | 1.87 | 1.60                          | 0.39  |      |      |
| Concerts          | 25      | 0.01                 | 2.58 | 3.78              | 0.35 | 5.30           | 1.24 | 18.45             | 1.07 | 2.32          | 0.17  | 0.41                | 2.86 | f, H                | 0.24                       | 37.26                             | 1.85   | 0.34                               | 3.17 | 1.98                          | 0.33  |      |      |
| Sport participant | 29      | 0.10                 | 1.71 | 2.54              | 0.53 | 9.45           | 0.78 | 26.41             | 1.16 | 2.03          | 0.20  | 5.57                | 2.10 | f, sports           | 0.52                       | 10.84                             | 1.02   | 1.08                               | 1.99 | 1.74                          | 0.28  |      |      |
| Sport attendant   | 30      | 0.06                 | 1.76 | 2.48              | 0.30 | 6.83           | 1.00 | 15.40             | 0.79 | 2.05          | 0.23  | 2.06                | 1.92 | f, H                | 0.41                       | 13.32                             | 1.24   | 0.86                               | 2.15 | 1.65                          | 0.33  |      |      |
| Dances            | 34      | 0.02                 | 2.63 | 3.99              | 0.36 | 8.31           | 0.80 | 32.82             | 0.96 | 2.38          | 0.18  | 1.43                | 2.78 | f                   | 0.18                       | 22.03                             | 1.08   | 0.41                               | 2.85 | 1.83                          | 0.23  |      |      |
| Parties           | 43      | 0.11                 | 1.50 | 4.06              | 0.44 | 8.40           | 0.76 | 35.56             | 1.02 | 2.53          | 0.19  | 9.44                | 1.76 | f                   | 0.33                       | 11.06                             | 1.08   | 1.18                               | 1.85 | 1.95                          | 0.19  |      |      |
| Eating out        | 59      | 0.30                 | 0.96 | 1.34              | 0.44 | 3.53           | 0.49 | 4.88              | 0.67 | 2.23          | 0.23  | 3.36                | 1.23 | f, H                | 0.33                       | 5.85                              | 2.16   | 1.76                               | 2.36 | 1.59                          | 0.30  |      |      |
|                   |         |                      |      |                   |      |                |      |                   |      |               | Total | 46.48               | 0.75 |                     |                            | Total                             | 56.21  | 1.12                               |      |                               | Total | 6.56 | 1.64 |
| 9-10th graders    |         |                      |      |                   |      |                |      |                   |      |               |       |                     |      |                     |                            |                                   |        |                                    |      |                               |       |      |      |
| given             |         | 69                   |      | usable            |      | 24             |      |                   |      |               |       |                     |      |                     |                            |                                   |        |                                    |      |                               |       |      |      |
| Activity type     | Num Obs | Number of Activities |      | Time (hr)         |      | Primary Links  |      | Contact-hours     |      | Contact-level |       | Contact-level-hours |      | Participating Group | Fraction counted in groups | Random Contacts per participation |        | Random Contacts per person per day |      | Random Contacts Contact-level |       |      |      |
|                   |         | per person per day   |      | per participation |      |                |      | per participation |      |               |       | per person per day  |      |                     |                            | per participation                 |        | per person per day                 |      | Contact-level                 |       |      |      |
|                   |         | Avg                  | CV   | Avg               | CV   | Avg            | CV   | Avg               | CV   | Avg           | CV    | Avg                 | CV   |                     |                            | Avg                               | CV     | Avg                                | CV   | Avg                           | CV    |      |      |
| Passing           | 19      | 5.71                 | 0.00 | 0.17              | 0.00 | 4.63           | 0.72 | 0.77              | 0.72 | 2.26          | 0.32  | 10.33               | 0.79 | f                   | 0.16                       | 7.87                              | 1.47   | 44.96                              | 1.47 | 1.64                          | 0.35  |      |      |
| Car rides         | 19      | 1.92                 | 0.83 | 0.46              | 0.77 | 2.87           | 0.86 | 1.48              | 1.37 | 2.26          | 0.32  | 7.69                | 1.95 | f, H                | 0.21                       | 1.95                              | 1.71   | 3.74                               | 1.90 | 1.43                          | 0.43  |      |      |
| School bus        | 7       | 0.31                 | 1.76 | 0.40              | 0.69 | 1.71           | 0.81 | 0.65              | 0.73 | 1.50          | 0.54  | 0.34                | 1.92 | f                   | 0.29                       | 1.86                              | 1.98   | 0.58                               | 2.65 | 1.50                          | 0.33  |      |      |
| City bus          | 4       | 0.04                 | 4.37 | 0.29              | 0.49 | 1.63           | 0.46 | 0.45              | 0.44 | 2.00          | 0.00  | 0.04                | 4.40 | f, H                | 0.00                       | 5.63                              | 1.20   | 0.22                               | 4.54 | 1.50                          | 0.33  |      |      |
| Mall              | 18      | 0.09                 | 1.11 | 2.42              | 0.42 | 3.39           | 0.60 | 8.36              | 0.71 | 2.31          | 0.24  | 1.69                | 1.34 | f, H                | 0.33                       | 21.39                             | 2.65   | 1.85                               | 2.87 | 1.50                          | 0.35  |      |      |
| Errands           | 6       | 0.08                 | 2.29 | 1.03              | 0.98 | 1.83           | 0.64 | 1.69              | 0.74 | 2.17          | 0.19  | 0.29                | 2.41 | H                   | 0.00                       | 3.75                              | 1.81   | 0.29                               | 2.92 | 1.75                          | 0.16  |      |      |
| Movies            | 21      | 0.07                 | 0.92 | 2.62              | 0.27 | 3.83           | 0.37 | 10.14             | 0.52 | 2.45          | 0.26  | 1.78                | 1.14 | f, H                | 0.33                       | 5.48                              | 2.02   | 0.37                               | 2.22 | 1.54                          | 0.32  |      |      |
| Concerts          | 8       | 0.01                 | 2.19 | 3.00              | 0.36 | 5.69           | 1.09 | 14.94             | 0.90 | 1.75          | 0.43  | 0.24                | 2.33 | f, H                | 0.00                       | 17.31                             | 1.94   | 0.15                               | 2.93 | 1.29                          | 0.31  |      |      |
| Sport participant | 11      | 0.08                 | 1.68 | 4.45              | 0.77 | 11.27          | 0.70 | 58.05             | 1.23 | 2.09          | 0.23  | 11.17               | 2.24 | f, sports           | 0.27                       | 12.18                             | 1.81   | 0.95                               | 2.47 | 2.14                          | 0.29  |      |      |
| Sport attendant   | 7       | 0.05                 | 2.20 | 3.07              | 0.42 | 12.50          | 0.96 | 45.86             | 1.20 | 2.00          | 0.20  | 4.25                | 2.49 | f, sports           | 0.14                       | 20.71                             | 2.34   | 0.67                               | 3.21 | 1.50                          | 0.27  |      |      |
| Dances            | 7       | 0.01                 | 3.06 | 4.21              | 0.35 | 7.21           | 0.78 | 25.93             | 0.62 | 2.36          | 0.24  | 0.57                | 3.13 | f                   | 0.14                       | 12.64                             | 1.36   | 0.20                               | 3.35 | 2.00                          | 0.31  |      |      |
| Parties           | 9       | 0.04                 | 1.86 | 3.44              | 0.46 | 12.67          | 0.79 | 50.92             | 0.99 | 2.44          | 0.22  | 5.31                | 2.16 | f, H                | 0.00                       | 5.17                              | 2.54   | 0.21                               | 3.15 | 2.00                          | 0.35  |      |      |
| Eating out        | 16      | 0.18                 | 1.39 | 1.63              | 0.38 | 4.06           | 0.48 | 7.00              | 0.67 | 2.16          | 0.20  | 2.73                | 1.58 | f, H                | 0.06                       | 6.66                              | 2.80   | 1.20                               | 3.12 | 1.64                          | 0.34  |      |      |
|                   |         |                      |      |                   |      |                |      |                   |      |               | Total | 46.43               | 0.74 |                     |                            | Total                             | 54.20  | 1.23                               |      |                               | Total | 6.56 | 1.64 |
| 7th graders       |         |                      |      |                   |      |                |      |                   |      |               |       |                     |      |                     |                            |                                   |        |                                    |      |                               |       |      |      |
| given             |         | 47                   |      | usable            |      | 26             |      |                   |      |               |       |                     |      |                     |                            |                                   |        |                                    |      |                               |       |      |      |
| Activity type     | Num Obs | Number of Activities |      | Time (hr)         |      | Primary Links  |      | Contact-hours     |      | Contact-level |       | Contact-level-hours |      | Participating Group | Fraction counted in groups | Random Contacts per participation |        | Random Contacts per person per day |      | Random Contacts Contact-level |       |      |      |
|                   |         | per person per day   |      | per participation |      |                |      | per participation |      |               |       | per person per day  |      |                     |                            | per participation                 |        | per person per day                 |      | Contact-level                 |       |      |      |
|                   |         | Avg                  | CV   | Avg               | CV   | Avg            | CV   | Avg               | CV   | Avg           | CV    | Avg                 | CV   |                     |                            | Avg                               | CV     | Avg                                | CV   | Avg                           | CV    |      |      |
| Passing           | 22      | 6.43                 | 0.00 | 0.08              | 0.00 | 5.82           | 0.83 | 0.48              | 0.83 | 2.17          | 0.25  | 7.16                | 0.80 | f                   | 0.23                       | 15.25                             | 1.12   | 98.04                              | 1.12 | 1.56                          | 0.52  |      |      |
| Car rides         | 19      | 1.85                 | 1.38 | 0.37              | 0.54 | 3.08           | 0.62 | 1.22              | 0.94 | 2.26          | 0.25  | 5.37                | 1.82 | f, H                | 0.16                       | 0.08                              | 4.36   | 0.05                               | 4.57 | 1.00                          | 0.00  |      |      |
| School bus        | 4       | 0.11                 | 2.54 | 0.25              | 0.27 | 3.63           | 0.52 | 0.96              | 0.59 | 2.00          | 0.00  | 0.21                | 2.61 | f                   | 0.00                       | 16.25                             | 0.35   | 1.75                               | 2.56 | 1.38                          | 0.35  |      |      |
| City bus          | 4       | 0.12                 | 3.64 | 0.27              | 0.65 | 1.75           | 0.37 | 0.43              | 0.57 | 1.88          | 0.13  | 0.10                | 3.69 | f, H                | 0.50                       | 6.38                              | 0.72   | 0.77                               | 3.71 | 1.25                          | 0.23  |      |      |
| Mall              | 18      | 0.06                 | 1.22 | 2.74              | 0.79 | 3.53           | 0.44 | 10.04             | 0.88 | 2.28          | 0.19  | 1.54                | 1.62 | f, H                | 0.22                       | 29.22                             | 1.30   | 1.81                               | 1.78 | 1.73                          | 0.42  |      |      |
| Errands           | 18      | 0.19                 | 0.95 | 1.43              | 0.57 | 2.31           | 0.43 | 3.65              | 0.81 | 2.14          | 0.32  | 1.58                | 1.23 | f, H                | 0.17                       | 10.22                             | 1.58   | 1.98                               | 1.85 | 1.63                          | 0.40  |      |      |
| Movies            | 20      | 0.03                 | 1.17 | 2.57              | 0.26 | 3.92           | 0.47 | 9.94              | 0.52 | 2.31          | 0.22  | 0.68                | 1.32 | f, H                | 0.22                       | 9.28                              | 1.14   | 0.27                               | 1.63 | 1.50                          | 0.43  |      |      |
| Concerts          | 15      | 0.01                 | 1.46 | 2.33              | 0.50 | 6.20           | 1.54 | 10.62             | 0.90 | 2.07          | 0.33  | 0.18                | 1.89 | f, H                | 0.07                       | 71.40                             | 1.21   | 0.54                               | 1.90 | 1.38                          | 0.39  |      |      |
| Sport participant | 9       | 0.12                 | 1.56 | 1.72              | 0.41 | 9.17           | 0.51 | 16.42             | 0.73 | 2.33          | 0.30  | 4.73                | 1.69 | f, sports           | 0.44                       | 11.50                             | 1.36   | 1.39                               | 2.07 | 2.00                          | 0.29  |      |      |
| Sport attendant   | 10      | 0.07                 | 2.56 | 1.73              | 0.56 | 6.70           | 0.62 | 10.33             | 0.62 | 2.00          | 0.24  | 1.47                | 2.65 | f, H                | 0.30                       | 19.25                             | 1.60   | 1.30                               | 3.02 | 1.94                          | 0.20  |      |      |
| Dances            | 11      | 0.01                 | 1.93 | 1.39              | 0.44 | 9.86           | 0.91 | 14.20             | 1.23 | 2.64          | 0.19  | 0.41                | 2.35 | f                   | 0.36                       | 27.64                             | 1.16   | 0.28                               | 2.26 | 2.10                          | 0.27  |      |      |
| Parties           | 15      | 0.03                 | 1.59 | 4.77              | 0.54 | 11.27          | 0.64 | 52.43             | 0.74 | 2.60          | 0.23  | 5.29                | 1.83 | f, H                | 0.40                       | 8.40                              | 1.34   | 0.29                               | 2.08 | 1.90                          | 0.30  |      |      |
| Eating out        | 21      | 0.14                 | 1.19 | 1.32              | 0.40 | 4.19           | 0.91 | 6.07              | 1.35 | 2.05          | 0.28  | 1.94                | 2.15 | f, H                | 0.24                       | 6.26                              | 1.45   | 0.87                               | 1.87 | 1.61                          | 0.30  |      |      |
|                   |         |                      |      |                   |      |                |      |                   |      |               | Total | 30.64               | 0.59 |                     |                            | Total                             | 108.56 | 1.01                               |      |                               | Total | 6.56 | 1.64 |
| 5th graders       |         |                      |      |                   |      |                |      |                   |      |               |       |                     |      |                     |                            |                                   |        |                                    |      |                               |       |      |      |
| given             |         | 44                   |      | usable            |      | 28             |      |                   |      |               |       |                     |      |                     |                            |                                   |        |                                    |      |                               |       |      |      |
| Activity type     | Num Obs | Number of Activities |      | Time (hr)         |      | Primary Links  |      | Contact-hours     |      | Contact-level |       | Contact-level-hours |      | Participating Group | Fraction counted in groups | Random Contacts per participation |        | Random Contacts per person per day |      | Random Contacts Contact-level |       |      |      |
|                   |         | per person per day   |      | per participation |      |                |      | per participation |      |               |       | per person per day  |      |                     |                            | per participation                 |        | per person per day                 |      | Contact-level                 |       |      |      |
|                   |         | Avg                  | CV   | Avg               | CV   | Avg            | CV   | Avg               | CV   | Avg           | CV    | Avg                 | CV   |                     |                            | Avg                               | CV     | Avg                                | CV   | Avg                           | CV    |      |      |
| Passing           | 0       | 0.00                 |      | 0.00              |      | 0.00           |      | 0.00              |      | 0.00          |       | 0.00                |      |                     | 0.00                       | 0.00                              | 0.00   | 0.00                               |      |                               |       |      |      |
| Car rides         | 13      | 0.49                 | 1.83 | 0.36              | 0.76 | 3.46           | 0.44 | 1.28              | 0.90 | 2.04          | 0.31  | 1.37                | 2.09 | f, H                | 0.15                       | 0.00                              | 0.00   | 0.00                               |      |                               |       |      |      |
| School bus        | 5       | 0.23                 | 2.22 | 0.28              | 0.44 | 3.10           | 0.40 | 0.77              | 0.33 | 1.60          | 0.14  | 0.29                | 2.26 | f                   | 0.00                       | 5.60                              | 1.56   | 1.27                               | 2.71 | 1.25                          | 0.28  |      |      |
| City bus          | 0       | 0.00                 |      | 0.00              |      | 0.00           |      | 0.00              |      | 0.00          |       | 0.00                |      |                     | 0.00                       | 0.00                              | 0.00   | 0.00                               |      |                               |       |      |      |
| Mall              | 16      | 0.04                 | 1.23 | 2.73              | 0.60 | 4.00           | 0.29 | 11.79             | 0.80 | 2.56          | 0.31  | 1.13                | 1.53 | f, H                | 0.20                       | 24.38                             | 2.49   | 0.89                               | 2.78 | 1.50                          | 0.30  |      |      |
| Errands           | 8       | 0.19                 | 2.72 | 1.41              | 0.70 | 3.63           | 0.38 | 4.48              | 0.64 | 2.88          | 0.27  | 2.38                | 2.81 | H                   | 0.14                       | 15.13                             | 1.67   | 2.91                               | 3.20 | 1.33                          | 0.39  |      |      |
| Movies            | 23      | 0.05                 | 1.03 | 2.67              | 0.23 | 4.39           | 0.33 | 11.74             | 0.41 | 2.28          | 0.32  | 1.25                | 1.13 | f, H                | 0.33                       | 6.98                              | 0.91   | 0.33                               | 1.37 | 1.37                          | 0.38  |      |      |
| Concerts          | 5       | 0.00                 | 3.40 | 3.50              | 0.20 | 5.90           | 0.26 | 20.50             | 0.29 | 2.80          | 0.41  | 0.30                | 3.45 | H                   | 0.25                       | 85.40                             | 1.20   | 0.42                               | 3.61 | 1.40                          | 0.39  |      |      |
| Sport participant | 5       | 0.02                 | 2.99 | 2.20              | 0.99 | 6.00           | 0.42 | 15.60             | 1.21 | 2.50          | 0.20  | 0.81                | 3.22 | f, H                | 0.40                       | 9.20                              | 1.37   | 0.18                               | 3.29 | 2.17                          | 0.13  |      |      |
| Sport attendant   | 4       | 0.02                 | 3.59 | 2.00              | 0.41 | 2.50           | 0.16 | 5.13              | 0.45 | 2.13          | 0.30  | 0.20                | 3.62 | f, H                | 0.50                       | 25.00                             | 2.00   | 0.47                               | 4.11 | 1.00                          | 0.00  |      |      |
| Dances            | 0       | 0.00                 |      | 0.00              |      | 0.00           |      | 0.00              |      | 0.00          |       | 0.00                |      |                     | 0.00                       | 0.00                              | 0.00   | 0.00                               |      |                               |       |      |      |
| Parties           | 9       | 0.01                 | 2.26 | 4.17              | 0.59 | 11.83          | 0.57 | 46.56             | 0.72 | 2.39          | 0.27  | 0.85                | 2.42 | f, H                | 0.25                       | 12.78                             | 1.32   | 0.09                               | 2.62 | 1.36                          | 0.35  |      |      |
| Eating out        | 18      | 0.10                 | 1.50 | 1.40              | 0.72 | 6.61           | 0.71 | 9.04              | 0.94 | 2.31          | 0.33  | 2.17                | 1.86 | f, H                | 0.33                       | 7.67                              | 2.30   | 0.78                               | 2.74 | 1.41                          | 0.52  |      |      |
|                   |         |                      |      |                   |      |                |      |                   |      |               | Total | 10.73               | 0.87 |                     |                            | Total                             | 6.56   | 1.64                               |      |                               | Total | 6.56 | 1.64 |
